# Supplementary material
Source: MDPI journal article supplement (https://www.mdpi.com/2073-445X/12/9/1693)
Supplement: s1 [file s1]

**Table S1.** Soil percolate properties in the free drainage and flooded treatments at different times after adding amendments.

| Treatment     | pH             | Redox Potential<br>(mV) | Absorbance 450 nm | Soluble Fe<br>(mg Fe/L) | Sulphate<br>(mg SO <sub>4</sub> <sup>2-</sup> /L) |
|---------------|----------------|-------------------------|-------------------|-------------------------|---------------------------------------------------|
| 5 days        |                |                         |                   |                         |                                                   |
| FC            | 3.86 ± 0.22 a  | 314 ± 35 c              | 10 ± 6 a          | 18 ± 31 ab              | 328 ± 241 a                                       |
| FS            | 4.52 ± 0.75 ab | 239 ± 82 bc             | 34 ± 38 a         | 69 ± 71 b               | 367 ± 315 a                                       |
| FM            | 4.68 ± 0.68 b  | 203 ± 83 ab             | 12 ± 6 a          | 16 ± 29 ab              | 280 ± 153 a                                       |
| FL            | 6.73 ± 0.40 c  | 129 ± 51 a              | 93 ± 111 a        | 0 ± 1 a                 | 388 ± 288 a                                       |
| DC            | 3.87 ± 0.23 a  | 387 ± 46 b              | 5 ± 2 a           | 0 ± 0 a                 | 166 ± 126 a                                       |
| DS            | 4.23 ± 0.48 a  | 312 ± 30 b              | 11 ± 3 a          | 65 ± 122 a              | 324 ± 415 a                                       |
| DM            | 4.32 ± 0.40 a  | 340 ± 59 b              | 9 ± 1 a           | 0 ± 0 a                 | 462 ± 333 a                                       |
| DL            | 7.04 ± 0.12 b  | 213 ± 64 a              | 30 ± 13 b         | 0 ± 0 a                 | 471 ± 476 a                                       |
| Two-way ANOVA |                |                         |                   |                         |                                                   |
| F             | ***            | ***                     | ns                | ns                      | ns                                                |
| I             | ns             | ***                     | ns                | ns                      | ns                                                |
| F × I         | ns             | ns                      | ns                | ns                      | ns                                                |
| 12 days       |                |                         |                   |                         |                                                   |
| FC            | 5.15 ± 0.38 a  | 228 ± 43 b              | 6 ± 2 a           | 111 ± 131 b             | 299 ± 290 a                                       |
| FS            | 6.32 ± 0.33 b  | 57 ± 85 a               | 41 ± 37 b         | 0 ± 0 ab                | 95 ± 17 a                                         |
| FM            | 6.04 ± 0.34 b  | 154 ± 6 ab              | 7 ± 3 a           | 12 ± 13 ab              | 390 ± 446 a                                       |
| FL            | 7.05 ± 0.31 c  | 105 ± 77 a              | 26 ± 13 ab        | 0 ± 1 a                 | 439 ± 618 a                                       |
| DC            | 4.14 ± 0.37 a  | 373 ± 51 b              | 1 ± 1 a           | 0 ± 0 a                 | 119 ± 45 a                                        |
| DS            | 4.93 ± 0.94 a  | 326 ± 58 b              | 6 ± 3 a           | 24 ± 48 a               | 168 ± 126 a                                       |
| DM            | 4.51 ± 0.60 a  | 308 ± 72 b              | 16 ± 15 a         | 41 ± 59 a               | 323 ± 336 a                                       |
| DL            | 7.46 ± 0.15 b  | 192 ± 22 a              | 36 ± 18 b         | 0 ± 0 a                 | 466 ± 697 a                                       |
| Two-way ANOVA |                |                         |                   |                         |                                                   |
| F             | ***            | ***                     | **                | ns                      | ns                                                |
| I             | ***            | ***                     | ns                | ns                      | ns                                                |
| F × I         | **             | ns                      | *                 | ns                      | ns                                                |
| 26 days       |                |                         |                   |                         |                                                   |
| FC            | 5.07 ± 0.64 a  | 282 ± 48 b              | 106 ± 170 a       | 115 ± 96 b              | 154 ± 164 a                                       |
| FS            | 5.67 ± 0.56 ab | 198 ± 24 a              | 176 ± 189 a       | 50 ± 82 ab              | 124 ± 198 a                                       |
| FM            | 6.12 ± 0.38 b  | 185 ± 49 a              | 412 ± 514 a       | 16 ± 18 ab              | 114 ± 163 a                                       |
| FL            | 7.86 ± 0.42 c  | 151 ± 40 a              | 97 ± 106 a        | 2 ± 4 a                 | 259 ± 480 a                                       |
| DC            | 4.03 ± 0.25 a  | 336 ± 40 b              | 6 ± 4 a           | 0 ± 0 a                 | 64 ± 49 a                                         |
| DS            | 4.86 ± 0.87 a  | 274 ± 30 b              | 6 ± 4 a           | 0 ± 0 a                 | 55 ± 38 a                                         |
| DM            | 5.08 ± 0.91 a  | 302 ± 61 b              | 14 ± 14 ab        | 0 ± 0 a                 | 82 ± 86 a                                         |
| DL            | 7.40 ± 0.81 b  | 202 ± 30 a              | 28 ± 12 b         | 0 ± 0 a                 | 161 ± 268 a                                       |
| Two-way ANOVA |                |                         |                   |                         |                                                   |
| F             | ***            | ***                     | ns                | ns                      | ns                                                |
| I             | ***            | ***                     | *                 | **                      | ns                                                |
| F × I         | ns             | ns                      | ns                | ns                      | ns                                                |
| 40 days       |                |                         |                   |                         |                                                   |

|               |                |             |              |            |             |
|---------------|----------------|-------------|--------------|------------|-------------|
| FC            | 5.96 ± 0.02 a  | 247 ± 38 c  | 28 ± 22 a    | 21 ± 11 ab | 91 ± 89 a   |
| FS            | 6.28 ± 0.19 ab | 218 ± 26 bc | 525 ± 299 b  | 22 ± 24 ab | 12 ± 17 a   |
| FM            | 6.48 ± 0.31 b  | 190 ± 20 ab | 468 ± 482 ab | 45 ± 30 b  | 63 ± 112 a  |
| FL            | 7.64 ± 0.19 c  | 154 ± 9 a   | 58 ± 29 a    | 0 ± 1 a    | 50 ± 77 a   |
| DC            | 4.06 ± 0.23 a  | 345 ± 41 b  | 3 ± 1 a      | 0 ± 0 a    | 47 ± 35 a   |
| DS            | 4.86 ± 0.56 a  | 322 ± 58 ab | 8 ± 5 ab     | 0 ± 0 a    | 42 ± 27 a   |
| DM            | 5.10 ± 0.96 a  | 312 ± 60 ab | 6 ± 4 ab     | 0 ± 0 a    | 66 ± 67 a   |
| DL            | 6.66 ± 0.89 b  | 264 ± 26 a  | 21 ± 19 b    | 0 ± 0 a    | 195 ± 364 a |
| Two-way ANOVA |                |             |              |            |             |
| F             | ***            | ***         | *            | *          | ns          |
| I             | ***            | ***         | **           | ***        | ns          |
| F × I         | ns             | ns          | *            | *          | ns          |
| 68 days       |                |             |              |            |             |
| FC            | 6.20 ± 0.53 a  | 380 ± 54 b  | 66 ± 53 a    | 6 ± 7 a    | 51 ± 43 b   |
| FS            | 6.21 ± 0.13 a  | 278 ± 40 a  | 879 ± 437 b  | 42 ± 39 b  | 2 ± 3 a     |
| FM            | 6.32 ± 0.10 a  | 275 ± 28 a  | 884 ± 910 b  | 25 ± 25 ab | 21 ± 34 ab  |
| FL            | 7.10 ± 0.19 b  | 253 ± 19 a  | 128 ± 64 ab  | 0 ± 0 a    | 5 ± 4 a     |
| DC            | 4.21 ± 0.41 a  | 371 ± 31 b  | 1 ± 2 a      | 0 ± 0 a    | 36 ± 29 a   |
| DS            | 4.92 ± 0.72 a  | 346 ± 57 ab | 1 ± 1 a      | 0 ± 0 a    | 20 ± 7 a    |
| DM            | 4.96 ± 0.58 a  | 348 ± 19 ab | 8 ± 11 ab    | 0 ± 0 a    | 35 ± 30 a   |
| DL            | 6.55 ± 0.42 b  | 294 ± 64 a  | 23 ± 19 b    | 0 ± 0 b    | 40 ± 48 a   |
| Two-way ANOVA |                |             |              |            |             |
| F             | ***            | ***         | *            | ns         | ns          |
| I             | ***            | ***         | ***          | **         | ns          |
| F × I         | *              | ns          | *            | ns         | ns          |
| 96 days       |                |             |              |            |             |
| FC            | 6.17 ± 0.14 a  | 129 ± 32 a  | 280 ± 238 a  | 20 ± 7 a   | 30 ± 36 a   |
| FS            | 6.29 ± 0.13 a  | 105 ± 42 a  | 437 ± 490 a  | 51 ± 60 a  | 5 ± 6 a     |
| FM            | 6.41 ± 0.13 a  | 114 ± 38 a  | 569 ± 640 a  | 27 ± 27 a  | 13 ± 18 a   |
| FL            | 7.19 ± 0.56 b  | 143 ± 29 a  | 203 ± 244 a  | 7 ± 13 a   | 7 ± 6 a     |
| DC            | 4.56 ± 0.53 a  | 285 ± 57 a  | 40 ± 66 a    | 0 ± 0 a    | 40 ± 37 a   |
| DS            | 5.39 ± 0.46 b  | 260 ± 55 a  | 9 ± 3 a      | 0 ± 0 a    | 22 ± 6 a    |
| DM            | 5.82 ± 0.60 b  | 248 ± 62 a  | 11 ± 4 a     | 0 ± 0 a    | 39 ± 34 a   |
| DL            | 6.66 ± 0.34 c  | 222 ± 44 a  | 36 ± 28 b    | 0 ± 0 a    | 26 ± 21 a   |
| Two-way ANOVA |                |             |              |            |             |
| F             | ***            | ns          | ns           | ns         | ns          |
| I             | ***            | ***         | ***          | ***        | ***         |
| F × I         | ns             | ns          | ns           | ns         | ns          |

Data are presented as the means of four replicates ( $n = 4$ ). Different lowercase letters in a column indicate significant differences among amendment additions in the same water treatment type at each sampling time ( $p < 0.05$ ). DC, DS, DM, and DL represent the treatments of control, straw, manure, and lime addition in the non-flooded treatment, respectively. FC, FS, FM, and FL denote the treatments of control, straw, manure, and lime addition in the flooded treatment, respectively. F, amendment treatment; I, water treatment; F × I, amendment treatment × water management; ns,  $p > 0.05$ ; \* represents  $p < 0.05$ , \*\* represents  $p < 0.01$ , \*\*\* represents  $p < 0.001$ .

**Table S2.** Soil properties in the flooded treatments during the second incubation at different times after adding amendments.

| Treatment     | pH             | Redox Potential (mV) | Biological Activity (mg C-CO <sub>2</sub> /kg dw Day) |
|---------------|----------------|----------------------|-------------------------------------------------------|
| 4 h           |                |                      |                                                       |
| FC            |                |                      | 0.00 ± 0.00 a                                         |
| FS            |                |                      | 21.68 ± 10.69 a                                       |
| FM            |                |                      | 301.68 ± 29.19 b                                      |
| FB            |                |                      | 344.04 ± 124.47 c                                     |
| One-way ANOVA |                |                      | ***                                                   |
| 1 day         |                |                      |                                                       |
| FC            | 3.90 ± 0.17 ab | 476 ± 16 b           | 2.10 ± 2.30 a                                         |
| FS            | 4.00 ± 0.21 a  | 338 ± 113 a          | 24.68 ± 9.56 b                                        |
| FM            | 4.56 ± 0.31 bc | 395 ± 48 a           | 87.68 ± 6.479 c                                       |
| FB            | 4.85 ± 0.38 c  | 403 ± 37 ab          | 136.45 ± 12.48 d                                      |
| One-way ANOVA | **             | **                   | ***                                                   |
| 2 days        |                |                      |                                                       |
| FC            | 3.88 ± 0.17 a  | 438 ± 24 c           | 10.16 ± 4.27 a                                        |
| FS            | 4.05 ± 0.21 a  | 239 ± 55 a           | 64.26 ± 23.62 b                                       |
| FM            | 4.46 ± 0.28 b  | 376 ± 20 b           | 108.16 ± 9.25 c                                       |
| FB            | 4.79 ± 0.34 c  | 383 ± 30 b           | 146.23 ± 14.38 d                                      |
| One-way ANOVA | ***            | ***                  | ***                                                   |
| 5 days        |                |                      |                                                       |
| FC            | 3.92 ± 0.16 a  | 404 ± 29 c           | 7.79 ± 3.27 a                                         |
| FS            | 4.53 ± 0.47 b  | 64 ± 99 a            | 46.41 ± 20.60 c                                       |
| FM            | 4.49 ± 0.29 b  | 327 ± 13 b           | 29.21 ± 4.04 b                                        |
| FB            | 4.78 ± 0.30 c  | 347 ± 18 bc          | 27.96 ± 1.79 b                                        |
| One-way ANOVA | ***            | **                   | ***                                                   |
| 7 days        |                |                      |                                                       |
| FC            | 3.86 ± 0.16 a  | 400 ± 19 c           | 16.37 ± 10.46 a                                       |
| FS            | 4.61 ± 0.42 b  | 102 ± 76 a           | 83.97 ± 6.16 c                                        |
| FM            | 4.45 ± 0.26 b  | 328 ± 18 b           | 35.89 ± 5.16 b                                        |
| FB            | 4.70 ± 0.30 b  | 350 ± 18 b           | 32.04 ± 5.16 b                                        |
| One-way ANOVA | ***            | ***                  | ***                                                   |
| 12 days       |                |                      |                                                       |
| FC            | 3.83 ± 0.17 a  | 406 ± 18 b           | 7.07 ± 2.57 a                                         |
| FS            | 4.74 ± 0.87 b  | 115 ± 179 a          | 37.89 ± 13.16 b                                       |
| FM            | 4.41 ± 0.25 b  | 323 ± 46 b           | 14.32 ± 2.74 a                                        |
| FB            | 4.62 ± 0.27 b  | 361 ± 30 b           | 11.06 ± 3.40 a                                        |
| One-way ANOVA | *              | ***                  | ***                                                   |
| 16 days       |                |                      |                                                       |
| FC            | 3.89 ± 0.16 a  | 412 ± 29 b           | 8.77 ± 2.96 a                                         |
| FS            | 4.81 ± 1.04 b  | 127 ± 179 a          | 49.10 ± 30.48 b                                       |
| FM            | 4.49 ± 0.27 ab | 346 ± 38 b           | 15.58 ± 4.44 a                                        |
| FB            | 4.68 ± 0.29 a  | 377 ± 28 b           | 11.35 ± 4.33 a                                        |

|               |                |             |                  |
|---------------|----------------|-------------|------------------|
| One-way ANOVA | *              | ***         | ***              |
| 19 days       |                |             |                  |
| FC            | 3.87 ± 0.16 a  | 419 ± 22 b  | 9.77 ± 3.55 a    |
| FS            | 4.78 ± 1.08 b  | 148 ± 181 a | 28.38 ± 42.22 b  |
| FM            | 4.45 ± 0.26 ab | 349 ± 35 b  | 16.49 ± 4.64 a   |
| FB            | 4.67 ± 0.29 b  | 369 ± 22 b  | 11.83 ± 5.03 a   |
| One-way ANOVA | ns             | ***         | ***              |
| 23 days       |                |             |                  |
| FC            | 3.84 ± 0.16 a  | 418 ± 22 b  | 6.91 ± 2.67 a    |
| FS            | 4.80 ± 1.18 b  | 140 ± 207 a | 38.78 ± 26.68 b  |
| FM            | 4.43 ± 0.27 ab | 345 ± 32 b  | 11.53 ± 3.07 a   |
| FB            | 4.64 ± 0.31 b  | 364 ± 22 b  | 8.25 ± 3.05 a    |
| One-way ANOVA | ns             | **          | **               |
| 28 days       |                |             |                  |
| FC            | 3.84 ± 0.16 a  | 430 ± 25 b  | 6.63 ± 2.67 a    |
| FS            | 4.85 ± 1.24 b  | 112 ± 177 a | 32.94 ± 18.48 b  |
| FM            | 4.40 ± 0.27 ab | 353 ± 34 b  | 10.15 ± 2.78 a   |
| FB            | 4.61 ± 0.30 ab | 377 ± 27 b  | 7.09 ± 2.80 a    |
| One-way ANOVA | ns             | ***         | ***              |
| 35 days       |                |             |                  |
| FC            | 3.78 ± 0.17 a  | 423 ± 22 b  | 5.98 ± 2.89 a    |
| FS            | 5.00 ± 1.26 b  | 59 ± 208 a  | 32.11 ± 15.985 b |
| FM            | 4.36 ± 0.26 ab | 359 ± 42 b  | 9.14 ± 2.41 a    |
| FB            | 4.56 ± 0.29 ab | 381 ± 33 b  | 6.51 ± 3.45 a    |
| One-way ANOVA | *              | ***         | ***              |
| 42 days       |                |             |                  |
| FC            | 3.77 ± 0.18 a  | 425 ± 38 b  | 6.38 ± 2.87 a    |
| FS            | 5.18 ± 1.09 c  | 28 ± 174 a  | 36.02 ± 13.72 b  |
| FM            | 4.37 ± 0.27 ab | 346 ± 42 b  | 10.42 ± 2.55 a   |
| FB            | 4.54 ± 0.29 bc | 364 ± 41 b  | 7.97 ± 3.53 a    |
| One-way ANOVA | **             | ***         | ***              |

Data are presented as the means of six replicates ( $n = 6$ ). Different lowercase letters in a column indicate significant differences among amendment additions at each sampling time ( $p < 0.05$ ). FC, FS, FM, and FB denote the treatments of control, straw, manure, and biochar addition in the flooded treatment, respectively. Ns,  $p > 0.05$ ; \* represents  $p < 0.05$ , \*\* represents  $p < 0.01$ , \*\*\* represents  $p < 0.001$ .
